# Supplementary material for: Exploring a new ultrasound score as a clinical predictive tool in patients with rheumatoid arthritis starting abatacept: results from the APPRAISE study
Source: PubMed Central journal article supplement — RMD Open. 2016 May 5;2(1):e000237. doi: 10.1136/rmdopen-2015-000237 (PMC4860864; doi:10.1136/rmdopen-2015-000237), 2016-05-05
Supplement: rmdopen-2015-000237supp_tables.pdf [file rmdopen-2015-000237supp_tables.pdf]

## Supplementary (online only) materials

### Supplementary Table 1 Correlation analysis performed

---

#### Variables

---

#### **Changes in DAS28 up to week 12 vs week 24**

Changes in GLOESS (22 paired joints, reduced 9 paired joint set) from baseline up to week 12 vs baseline to week 24

#### **Changes in GLOESS (MCPs 2–5, 22 paired joints, reduced 9 paired joint set) from baseline up to week 12 and lower levels of synovitis\* at week 24**

Changes in GLOESS at week 1 and changes in GLOESS during the entire treatment period (baseline to week 24)

#### **Changes in DAS28 and changes in GLOESS (MCPs 2–5, 22 paired joints, reduced 9 paired joint set, 28 joints<sup>†</sup>) or component scores (SH, PD, JE) from baseline**

GLOESS (MCPs 2–5) or component scores (SH, PD, JE) vs SJC

#### **GLOESS (MCPs 2–5) or component scores (SH, PD, JE) vs TJC**

#### **GLOESS (MCPs 2–5) or component scores (SH, PD, JE) vs SJC + TJC combined**

#### **Changes in GLOESS (MCPs 2–5, 22 paired joints, reduced 9 paired joint set) week or components (SH, PD, JE) up to week 4 vs change in the sum of swollen joints (MCPs 2–5, 22 paired joints, reduced 9 paired joint set) at weeks 12 and 24**

---

\*Defined by a GLOESS at week 24 that was less than the median GLOESS at that time point. <sup>†</sup>The 28 joints assessed for tenderness and swelling as part of the DAS28. DAS28, Disease Activity Score 28; GLOESS, Global OMERACT-EULAR Synovitis Score; JE, joint effusion; MCPs, metacarpophalangeal joints; PD, power Doppler assessed synovial vascularization; SH, hypoechoic synovial hyperplasia; SJC, swollen joint count; TJC, tender joint count.

**Supplementary Table 2** Correlation between changes in GLOESS up to week 12 and achieving lower levels of synovitis at week 24 (defined as having a GLOESS at week 24 that is less than the median value at that time point)

|                     | <b>Spearman's correlation coefficient</b> |                            |                                   |
|---------------------|-------------------------------------------|----------------------------|-----------------------------------|
|                     | <b>MCPs (2–5)</b>                         | <b>22 paired joint set</b> | <b>Reduced 9 paired joint set</b> |
| Baseline to week 1  | –0.36<br>(–0.53, –0.14)                   | –0.01<br>(–0.23, 0.21)     | 0.07<br>(–0.16, 0.30)             |
| Baseline to week 2  | –0.20<br>(–0.39, 0.02)                    | –0.02<br>(–0.23, 0.19)     | –0.01<br>(–0.23, 0.20)            |
| Baseline to week 4  | –0.44<br>(–0.59, –0.24)                   | –0.19<br>(–0.39, 0.03)     | –0.08<br>(–0.30, 0.14)            |
| Baseline to week 8  | –0.31<br>(–0.49, –0.10)                   | –0.15<br>(–0.36, 0.07)     | 0.09<br>(–0.14, 0.31)             |
| Baseline to week 12 | –0.55<br>(–0.68, –0.37)                   | –0.30<br>(–0.49, –0.09)    | –0.16<br>(–0.37, 0.06)            |

CI, confidence interval; GLOESS, Global OMERACT-EULAR Synovitis Score; MCPs, metacarpophalangeal joints.

**Supplementary Table 3** Standardized response means for changes in DAS28 and GLOESS using the MCP 2–5, 22 paired, and reduced 9 paired joint sets

| <b>Measure</b>                         | <b>Time point</b> | <b>n</b> | <b>Mean change from baseline</b> | <b>SE</b> | <b>SD</b> | <b>SRM*</b> |
|----------------------------------------|-------------------|----------|----------------------------------|-----------|-----------|-------------|
| DAS28                                  | Week 1            | 91       | −0.55                            | 0.078     | 0.743     | −0.734      |
|                                        | Week12            | 103      | −1.77                            | 0.113     | 1.149     | −1.542      |
|                                        | Week 24           | 103      | −2.13                            | 0.136     | 1.379     | −1.541      |
| GLOESS<br>(MCPs 2–5)                   | Week 1            | 86       | −0.70                            | 0.282     | 2.615     | −0.268      |
|                                        | Week12            | 95       | −3.80                            | 0.454     | 4.425     | −0.859      |
|                                        | Week 24           | 95       | −4.80                            | 0.473     | 4.610     | −1.041      |
| GLOESS<br>(22 paired joints)           | Week 1            | 87       | −1.70                            | 0.852     | 7.947     | −0.214      |
|                                        | Week12            | 95       | −11.70                           | 1.39      | 13.548    | −0.864      |
|                                        | Week 24           | 95       | −15.70                           | 1.65      | 16.082    | −0.976      |
| GLOESS<br>(reduced 9 paired joint set) | Week 1            | 81       | −0.60                            | 0.362     | 3.258     | −0.184      |
|                                        | Week12            | 91       | −5.30                            | 0.583     | 5.561     | −0.953      |
|                                        | Week 24           | 91       | −6.40                            | 0.725     | 6.916     | −0.925      |

\*SRM was calculated by dividing the mean change from baseline by the SD of the change. DAS28, Disease Activity Score 28; GLOESS, Global OMERACT-EULAR Synovitis Score; MCP, metacarpophalangeal; SD, standard deviation; SE, standard error; SRM, standardized response mean.
